# Supplementary material
Source: PubMed Central journal article supplement (PMC1797283)
Supplement: jbacter_189_3_844__1.pdf [file jbacter_189_3_844__1.pdf]

**Supplemental Table 1. MPP-homologous genes in archaeal and eubacterial genomes**

| Domain            | Genomes | $\beta$ MPP-like genes <sup>*</sup> | $\alpha$ MPP-like genes <sup>*</sup> |
|-------------------|---------|-------------------------------------|--------------------------------------|
| Archaea           | 29      | 1                                   | 1                                    |
| Eubacteria        | 511     | 487                                 | 117 (No GRLs)                        |
| <i>Rickettsia</i> | 20      | 33                                  | 19 (No GRLs)                         |

<sup>\*</sup>The expect values under  $1E^{-10}$  are counted after BLAST search, using yeast  $\beta$ MPP as a query

## Legends for Supplemental Figures

**Supplemental Fig. 1.** Expression and purification of RPP. *A*, RT-PCR analysis for the RPP gene. The gene-specific first primers and PCR primer pairs are shown as long and short arrows, respectively. The RT-PCR products in the presence or absence of reverse transcriptase (RT: + or -) were separated by agarose gel electrophoresis and stained with ethidium bromide. The PCR product for GroEL was electrophoresed following 10-fold dilution compared to that for RPP. *B*, Immunoblotting analysis of RPPs. Following independent recovery of Vero cells infected by different *Rickettsia* species, the proteins were separated by SDS-PAGE and detected by western blotting using an anti-RPP polyclonal antibody. Rec., His<sub>6</sub>-tagged recombinant protein. *C*, Purification of recombinant RPP. RPP was expressed in *E. coli* BL21 and purified as described in the Materials and Methods. The proteins were separated by SDS-PAGE and either stained with Coomassie Brilliant Blue R-250 (*upper*) or detected by western blotting using an anti-RPP polyclonal antibody (*lower*). C, control non-transformed *E. coli* BL21 cells; T, total cells transformed with pET-RPP; P, pellets obtained following centrifugation at 10,000 x g after cell lysis; S, supernatants obtained following centrifugation at 10,000 x g after cell lysis. Lanes 1, 2 and 3 show the eluates from the nickel-chelating, first DEAE-Sepharose and second DEAE-Sepharose columns, respectively.

**Supplemental Fig 2.** Reverse-phase HPLC analyses of the peptide cleavage activity of RPP. Peptides were incubated in the presence (+) or absence (-) of RPP and separated as described in the Materials and Methods. Arrows indicate the peptide fragments cleaved by RPP. VIP: vasoactive intestinal protein.

**Supplemental Fig 3.** Action of RPP toward basic proteins. Native or denatured proteins (12.5 µg/ml) were incubated with (+) or without (-) RPP (1.25 µg/ml) in the processing buffer at 30°C for 60 min, separated by SDS-PAGE and silver-stained. The protein denaturation was performed in 10 mM HEPES-KOH (pH 7.5) containing 8 M urea and 10 mM DTT before the incubation with RPP, and the denatured proteins were rapidly diluted by 100-fold in the processing buffer. Sub: substrate proteins.

**Supplemental Fig 4.** Reverse-phase HPLC analyses of presequence peptide cleavage by RPP. Synthetic peptides were incubated in the presence (+) or absence (-) of RPP or MPP and separated by reverse-phase HPLC as described in the Materials and Methods. Arrows indicate the peptide fragments cleaved by RPP and MPP. Enz: enzyme.

**Supplemental Fig 5.** Reverse-phase HPLC analyses of preMDH peptide cleavage by RPP and its mutant. Synthetic peptides of MDH<sub>2-28</sub> were incubated with RPP, RPP\* (E52Q mutant) and MPP, and then separated by reverse-phase HPLC as described in the Materials and Methods. Cleaved peptides were identified by MALDI-TOF mass spectrometry and their sequences are shown at the bottom.

**Supplemental Fig 6.** Evolution of MPP from a progenitor peptidase in an ancient parasite. See the Discussion for details. The M16 peptidase, porin and permease encoded in the parasitic genome are converted into distinct component proteins of a transport-processing system, which assemble and work systematically with each other.

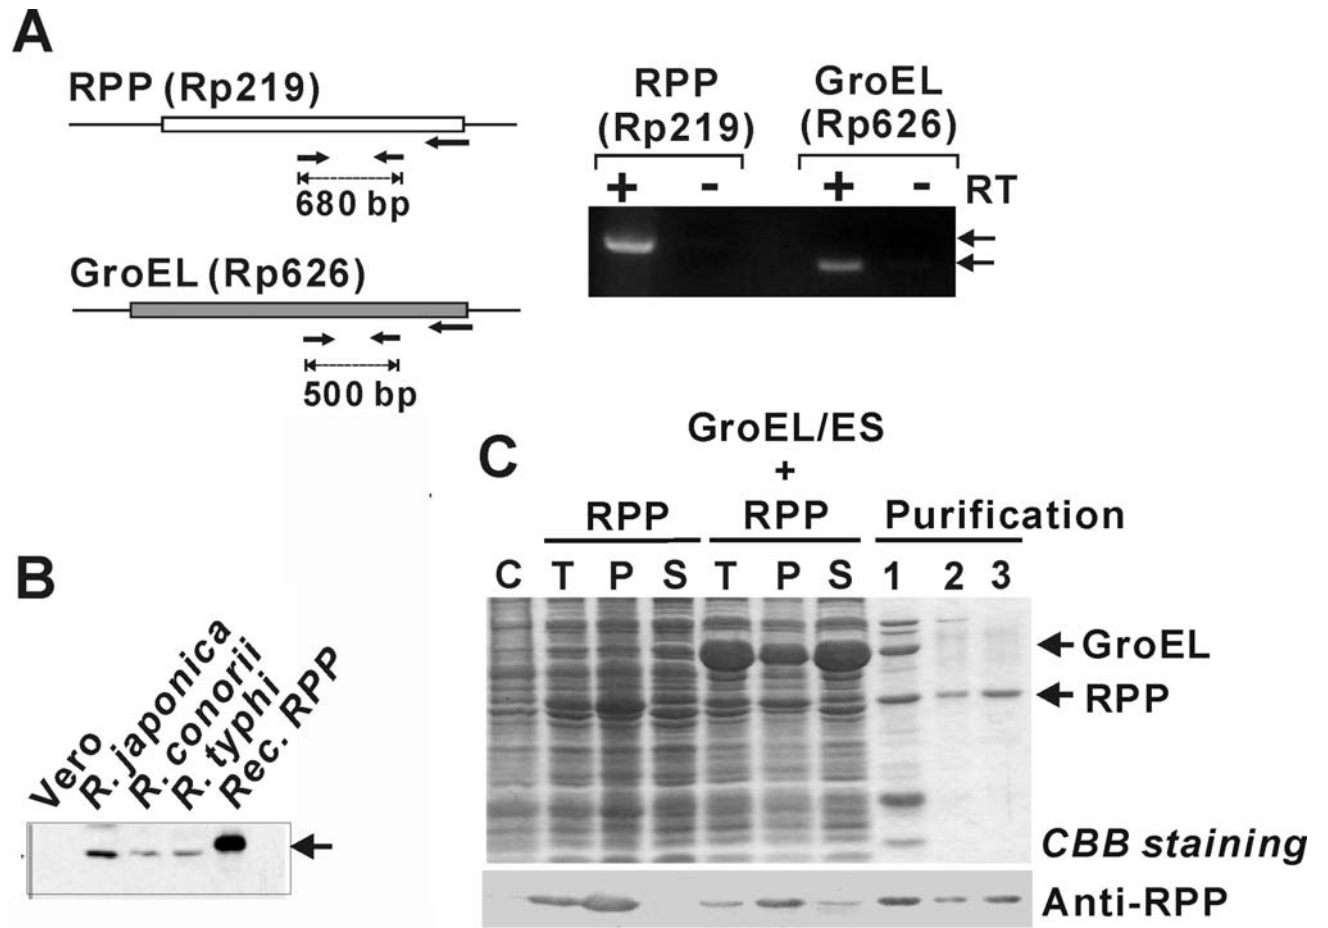

Supplemental Figure 1

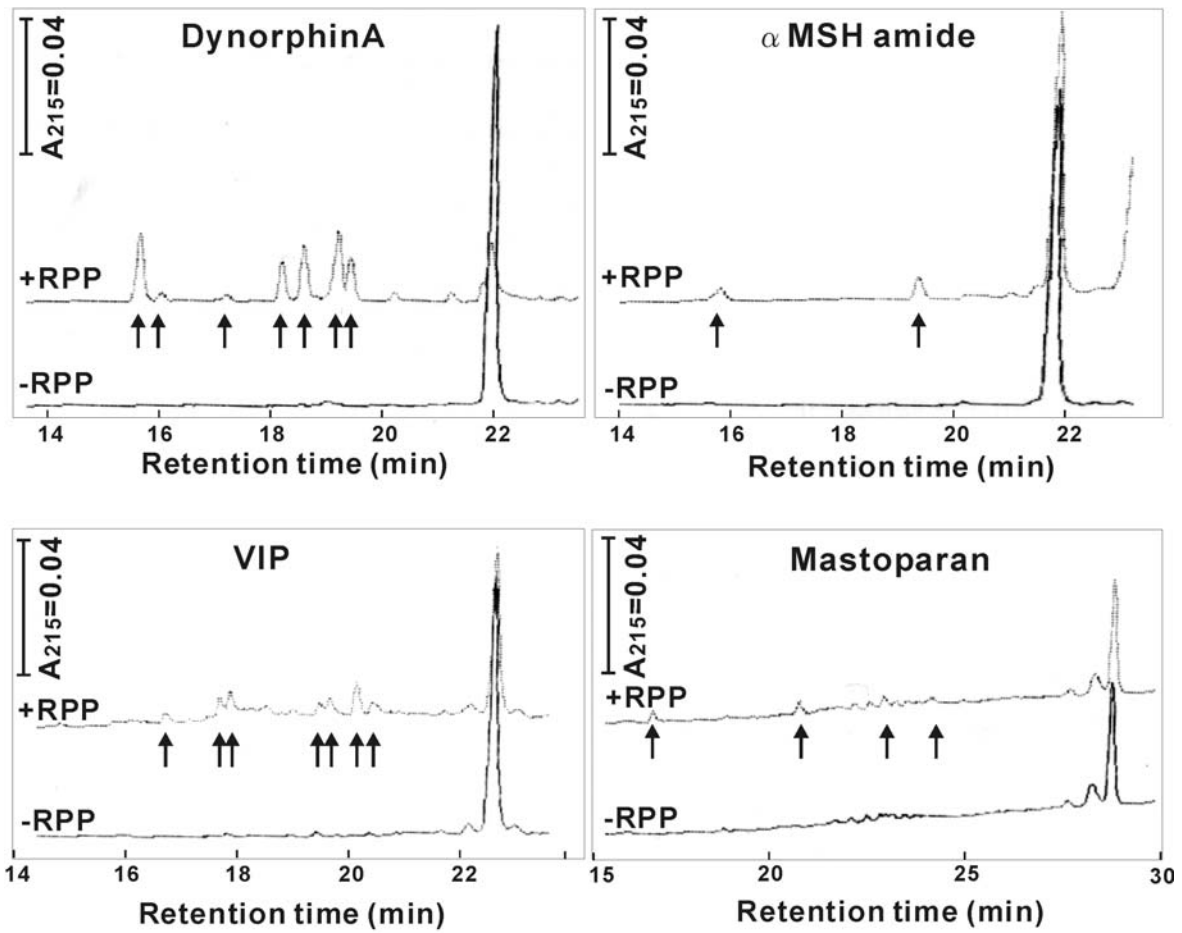

**Supplemental Figure 2**

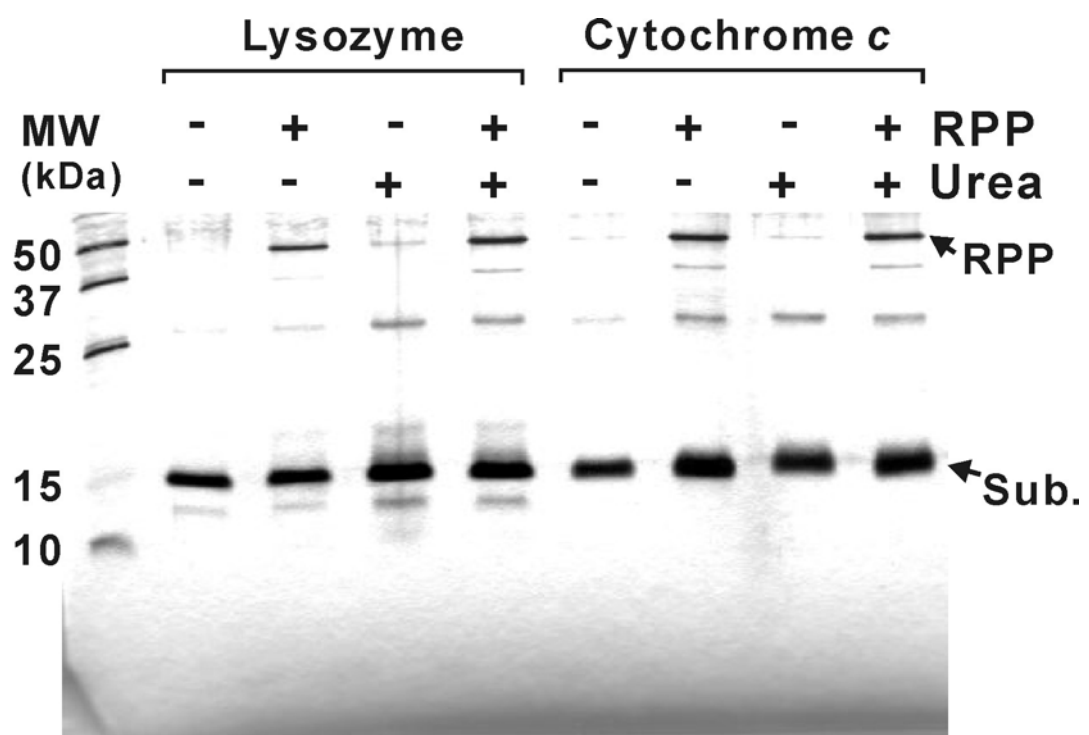

**Supplemental Figure 3**

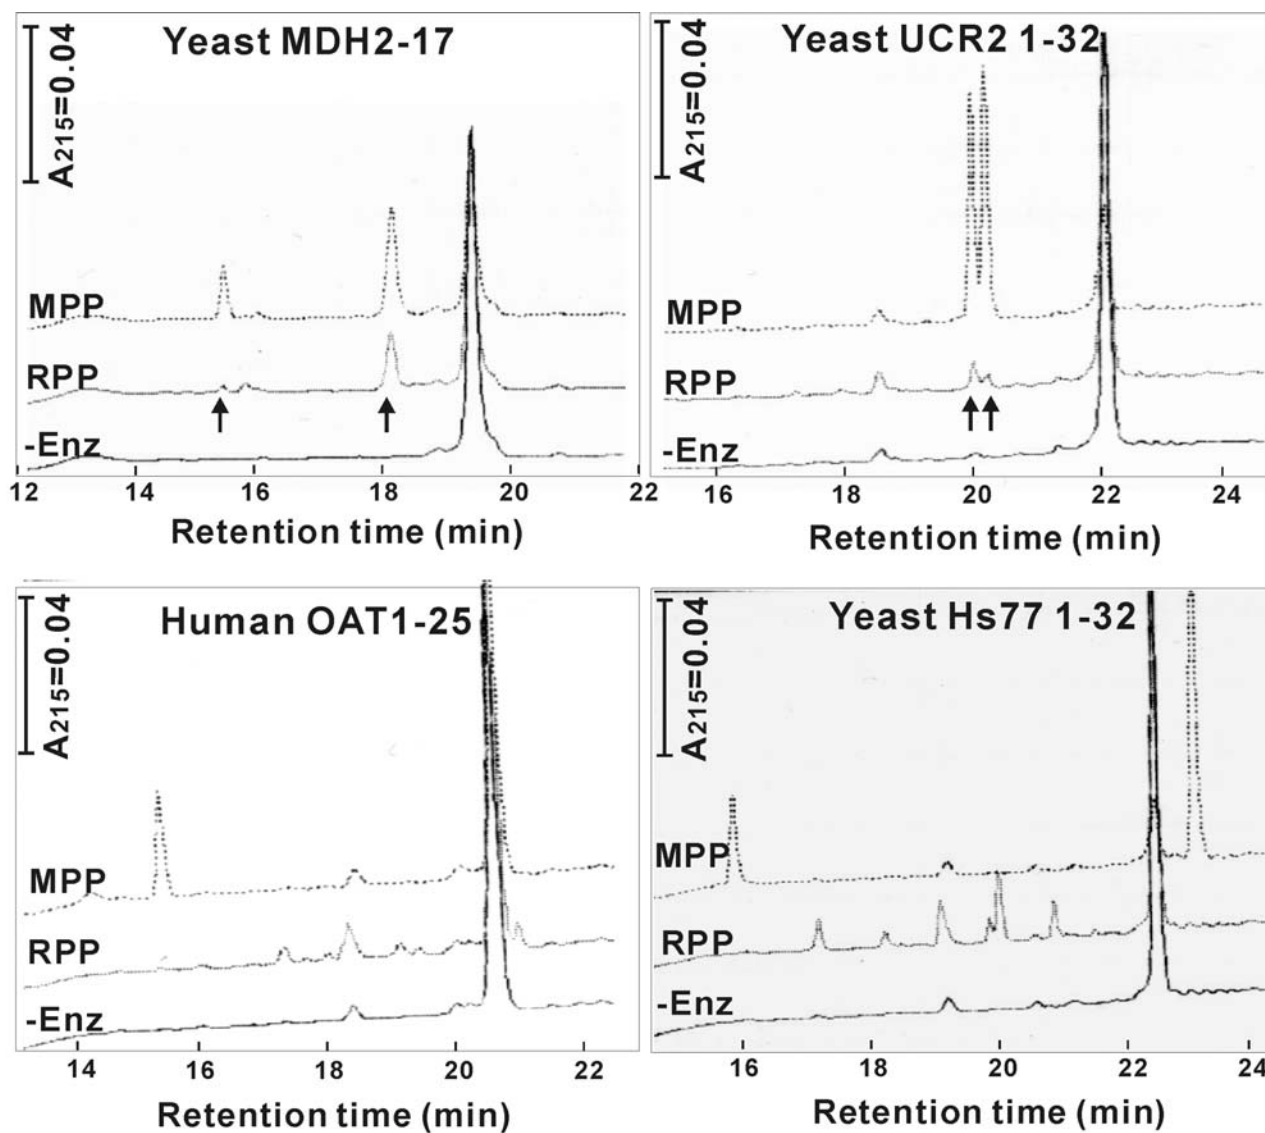

**Supplemental Figure 4**

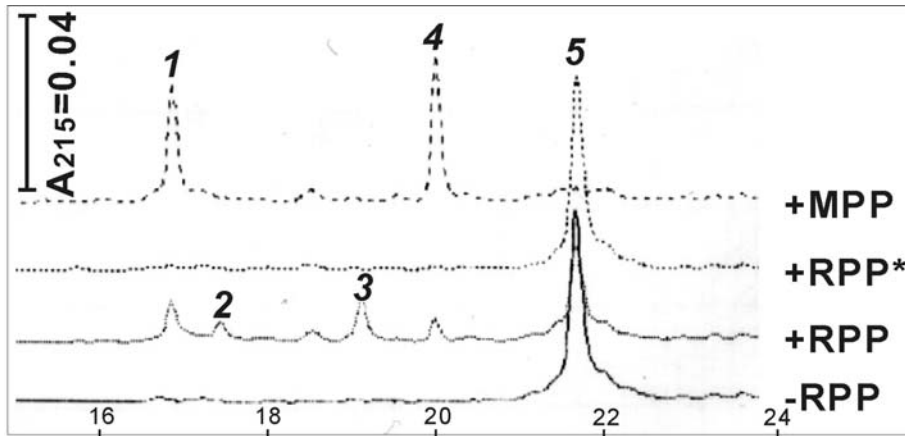

Retention time (min)

**MDH2-28: LSALARPVGAALRRSFSTSAQNNAKVA**

*Peptide-1*

*Peptide-2*

*Peptide-3*

*Peptide-4*

*Peptide-5*

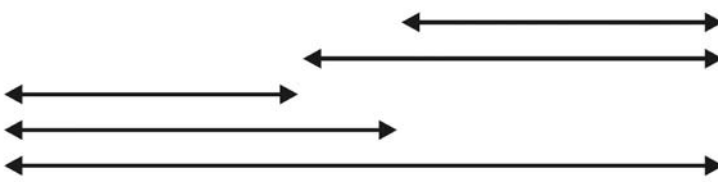

**Supplemental Figure 5**



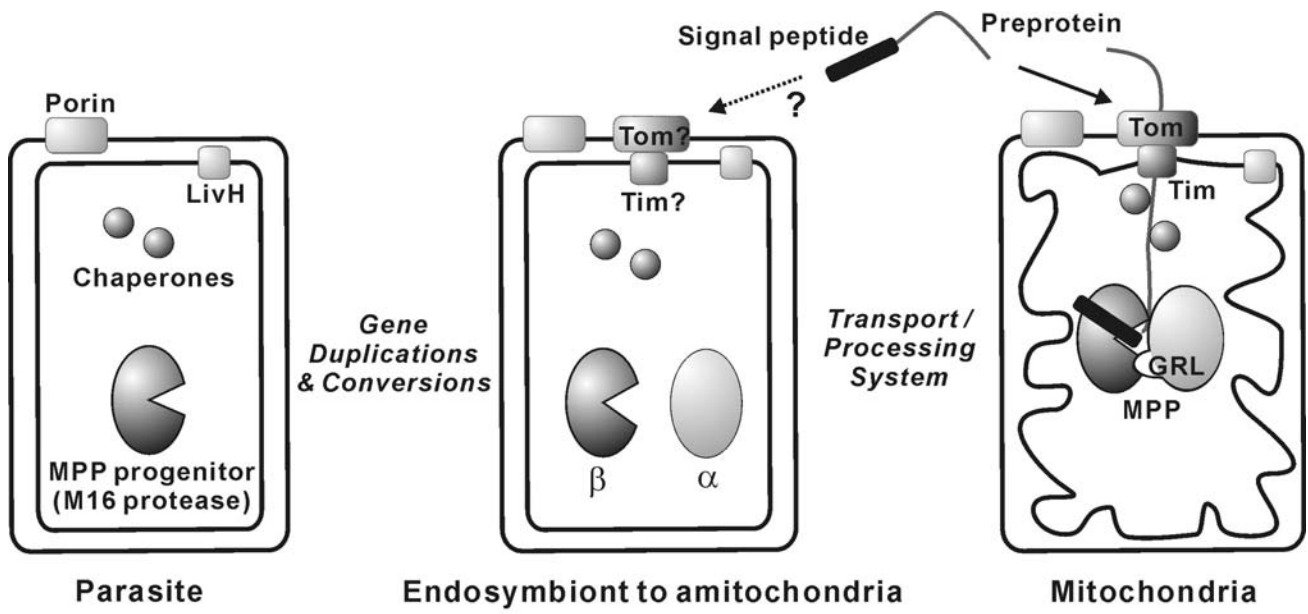

**Supplemental Figure 6**
